# Supplementary material for: Kinetic Resolution in Transannular Morita-Baylis-Hillman Reaction: An Approximation to the Synthesis of Sesquiterpenes from Guaiane Family
Source: MDPI journal article supplement (doi:10.3390/catal12010067), 2022-01-08
Supplement: s1 [file s1]

# Kinetic Resolution in Transannular Morita-Baylis-Hillman Reaction: An Approximation to the Synthesis of Sesquiterpenes from Guaiane Family

Raquel Mato<sup>1</sup>, Rubén Manzano<sup>1,2</sup>, Efraím Reyes<sup>1,\*</sup>, Liher Prieto<sup>1</sup>, Uxue Uria<sup>1</sup>, Luisa Carrillo<sup>1</sup> and Jose L. Vicario<sup>1,\*</sup>

<sup>1</sup> Department of Organic and Inorganic Chemistry, University of the Basque Country (UPV/EHU), P.O. Box 644, 48080 Bilbao (Bizkaia), Spain; joseluis.vicario@ehu.es

<sup>2</sup> Current Address: Departamento de Química Orgánica y Química Inorgánica, and Instituto de Investigación Química Andrés Manuel del Río (IQAR), Universidad de Alcalá, Alcalá de Henares 28805, Spain; ruben.manzano@uah.es

\* Correspondence: efrain.reyes@ehu.es; joseluis.vicario@ehu.es

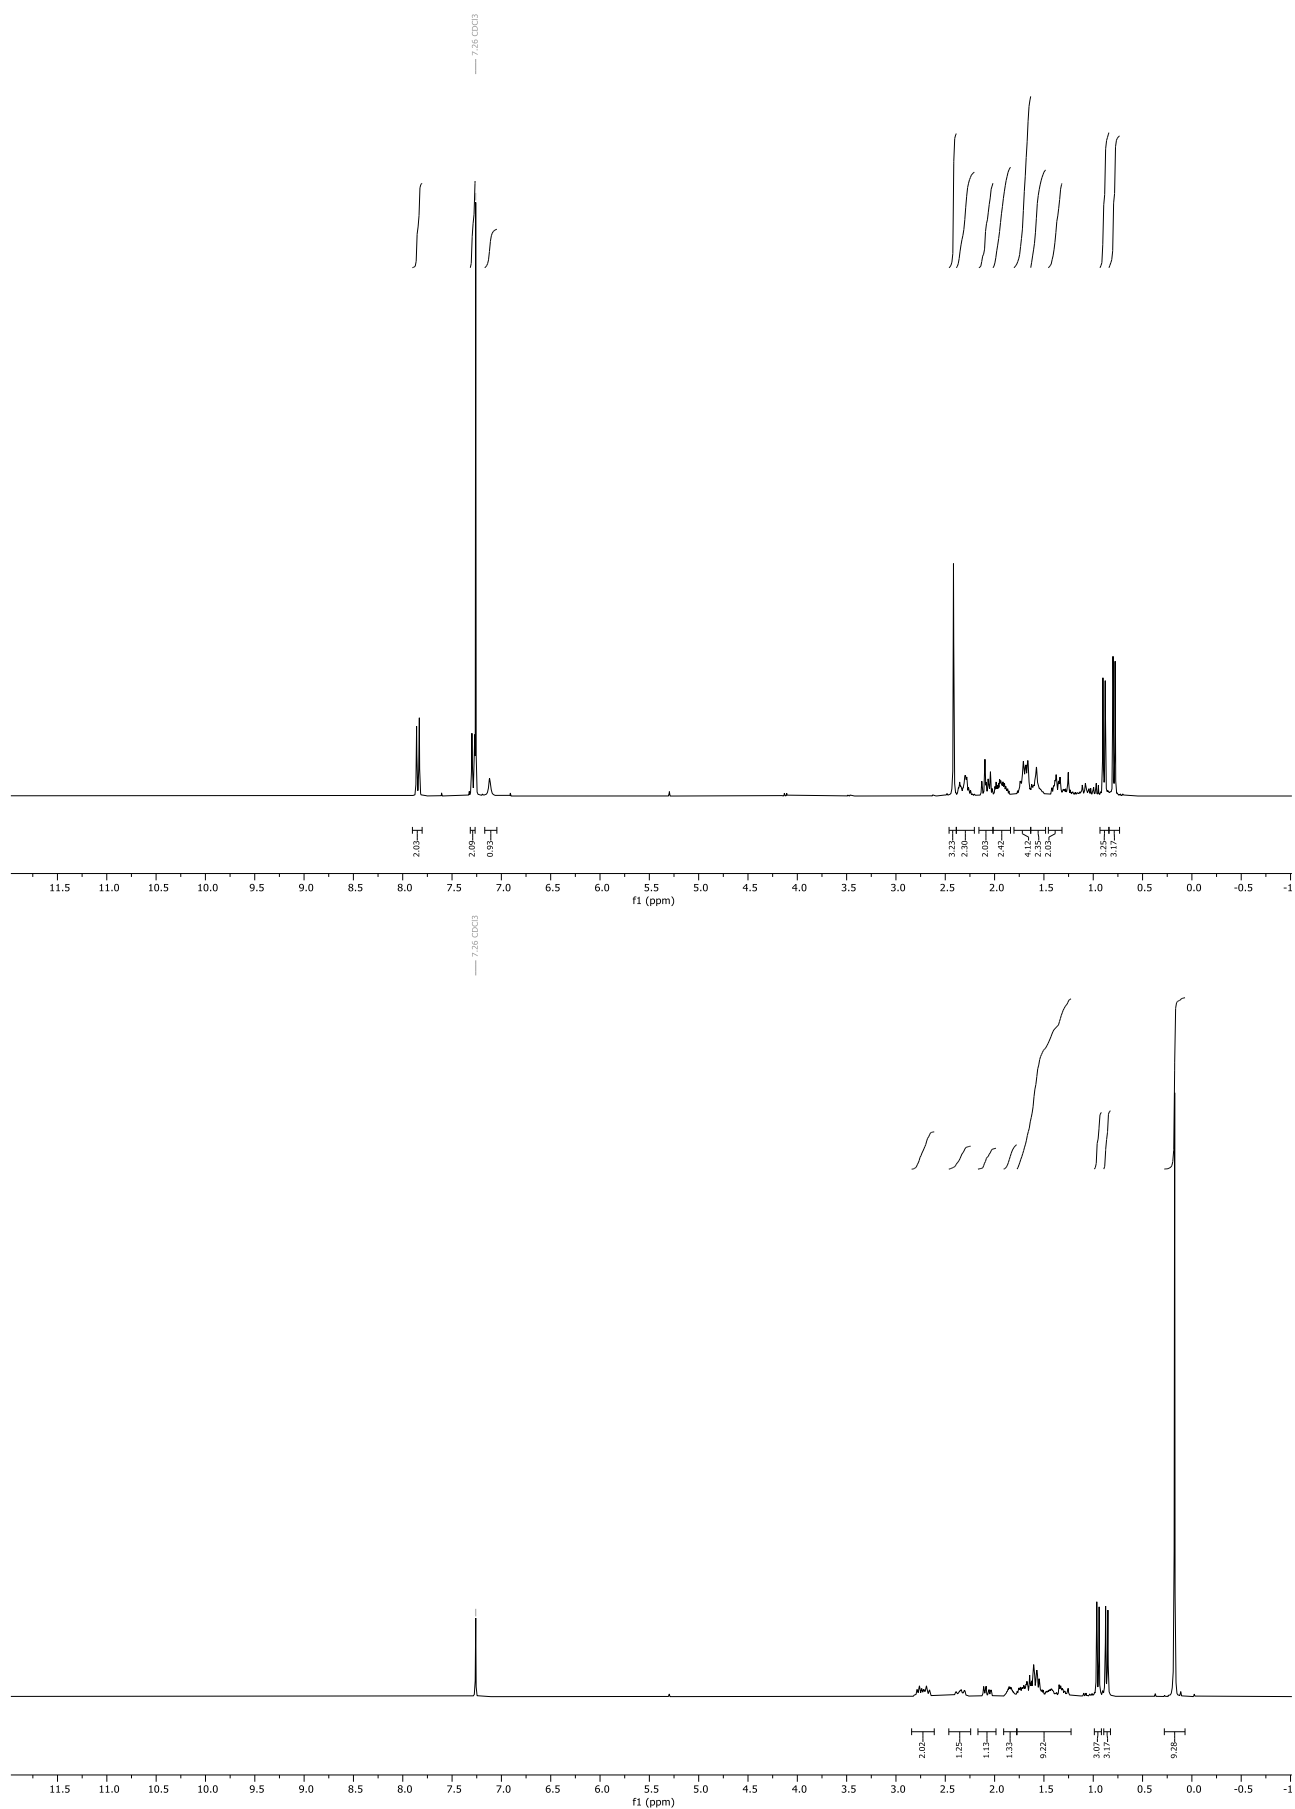

**Figure S1.**  $^1\text{H}$ -NMR (300 MHz,  $\text{CDCl}_3$ ) spectra of compound **9** and **10**

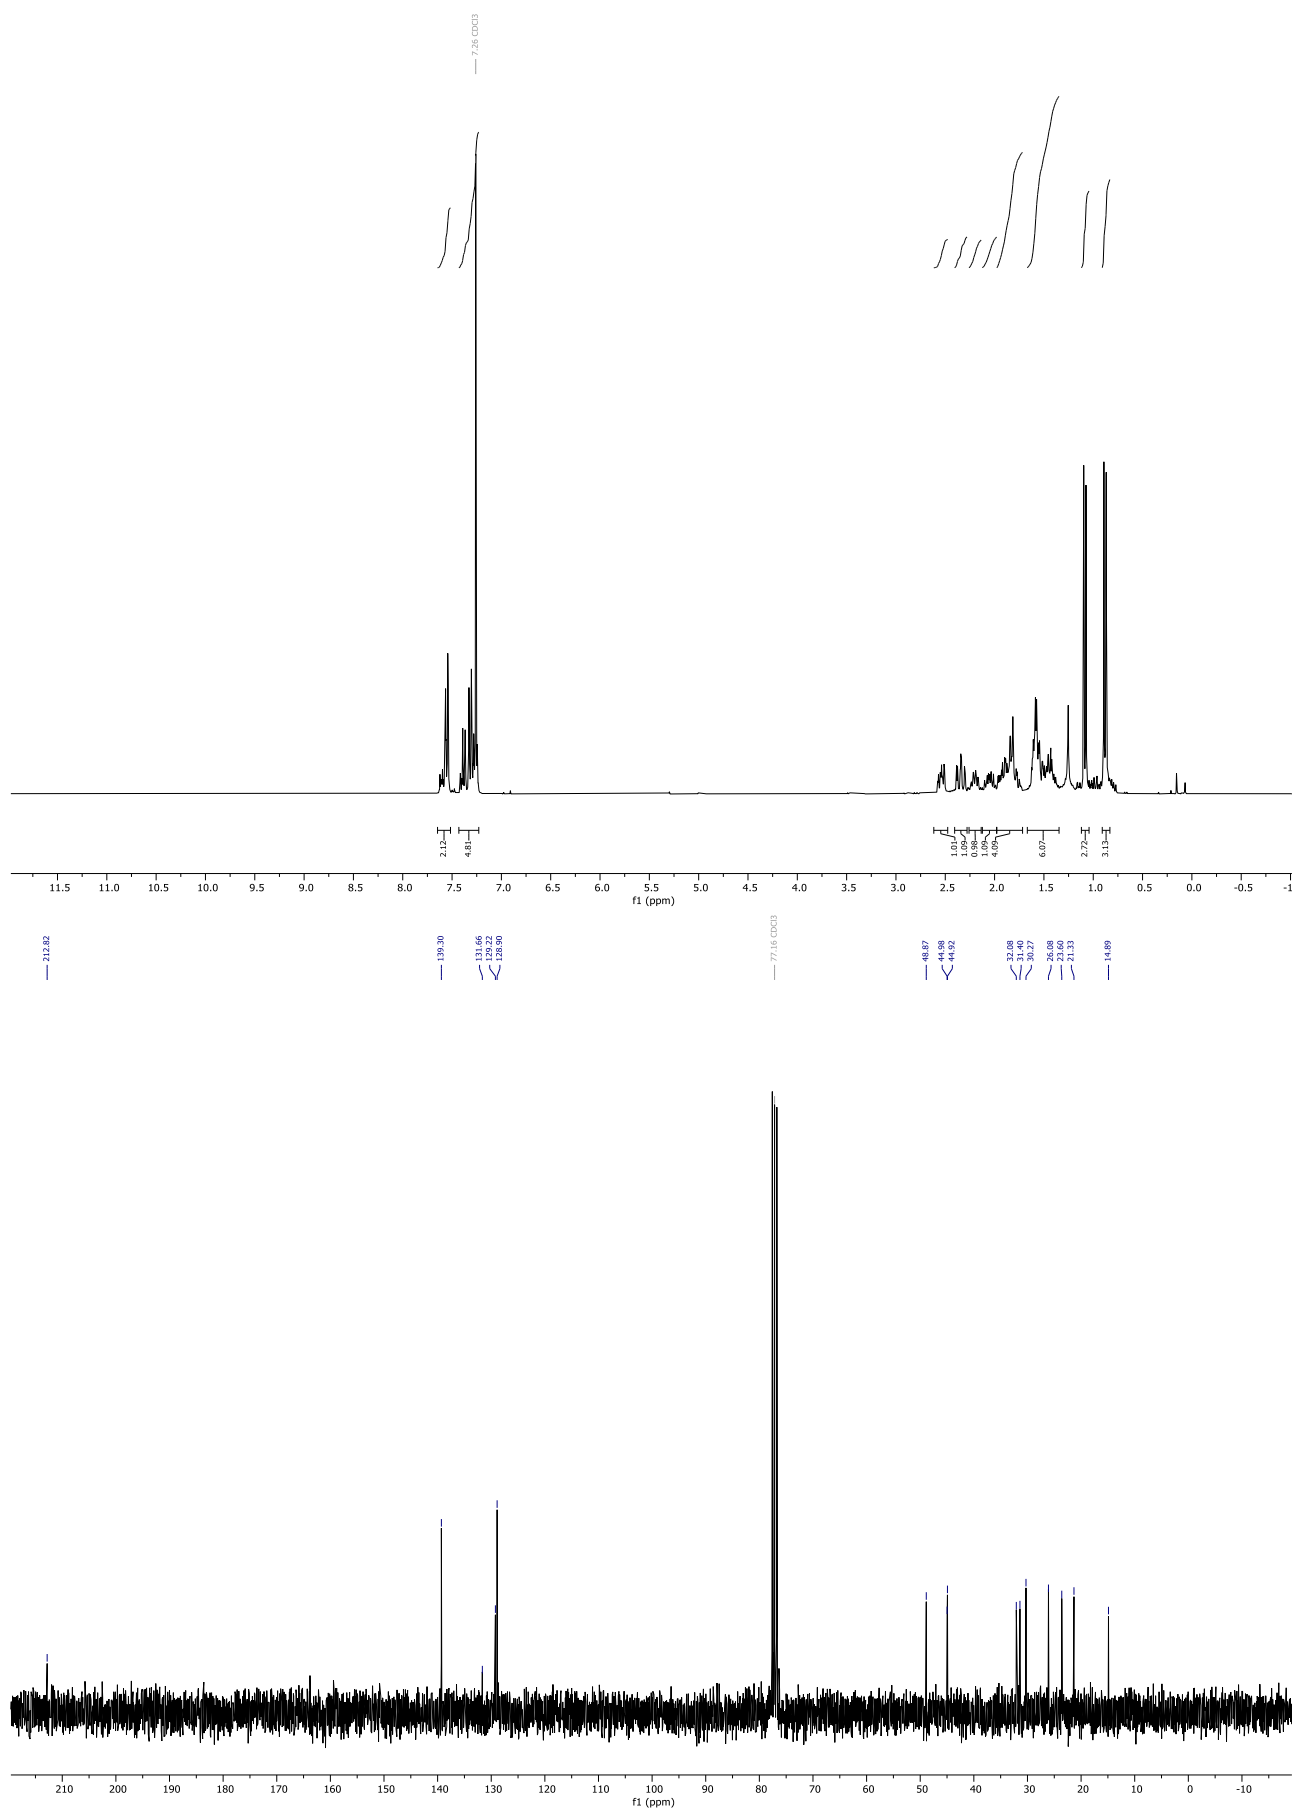

**Figure S2.** <sup>1</sup>H-NMR (300 MHz, CDCl<sub>3</sub>) and <sup>13</sup>C-NMR (75.5 MHz, CDCl<sub>3</sub>) spectra of compound **11**

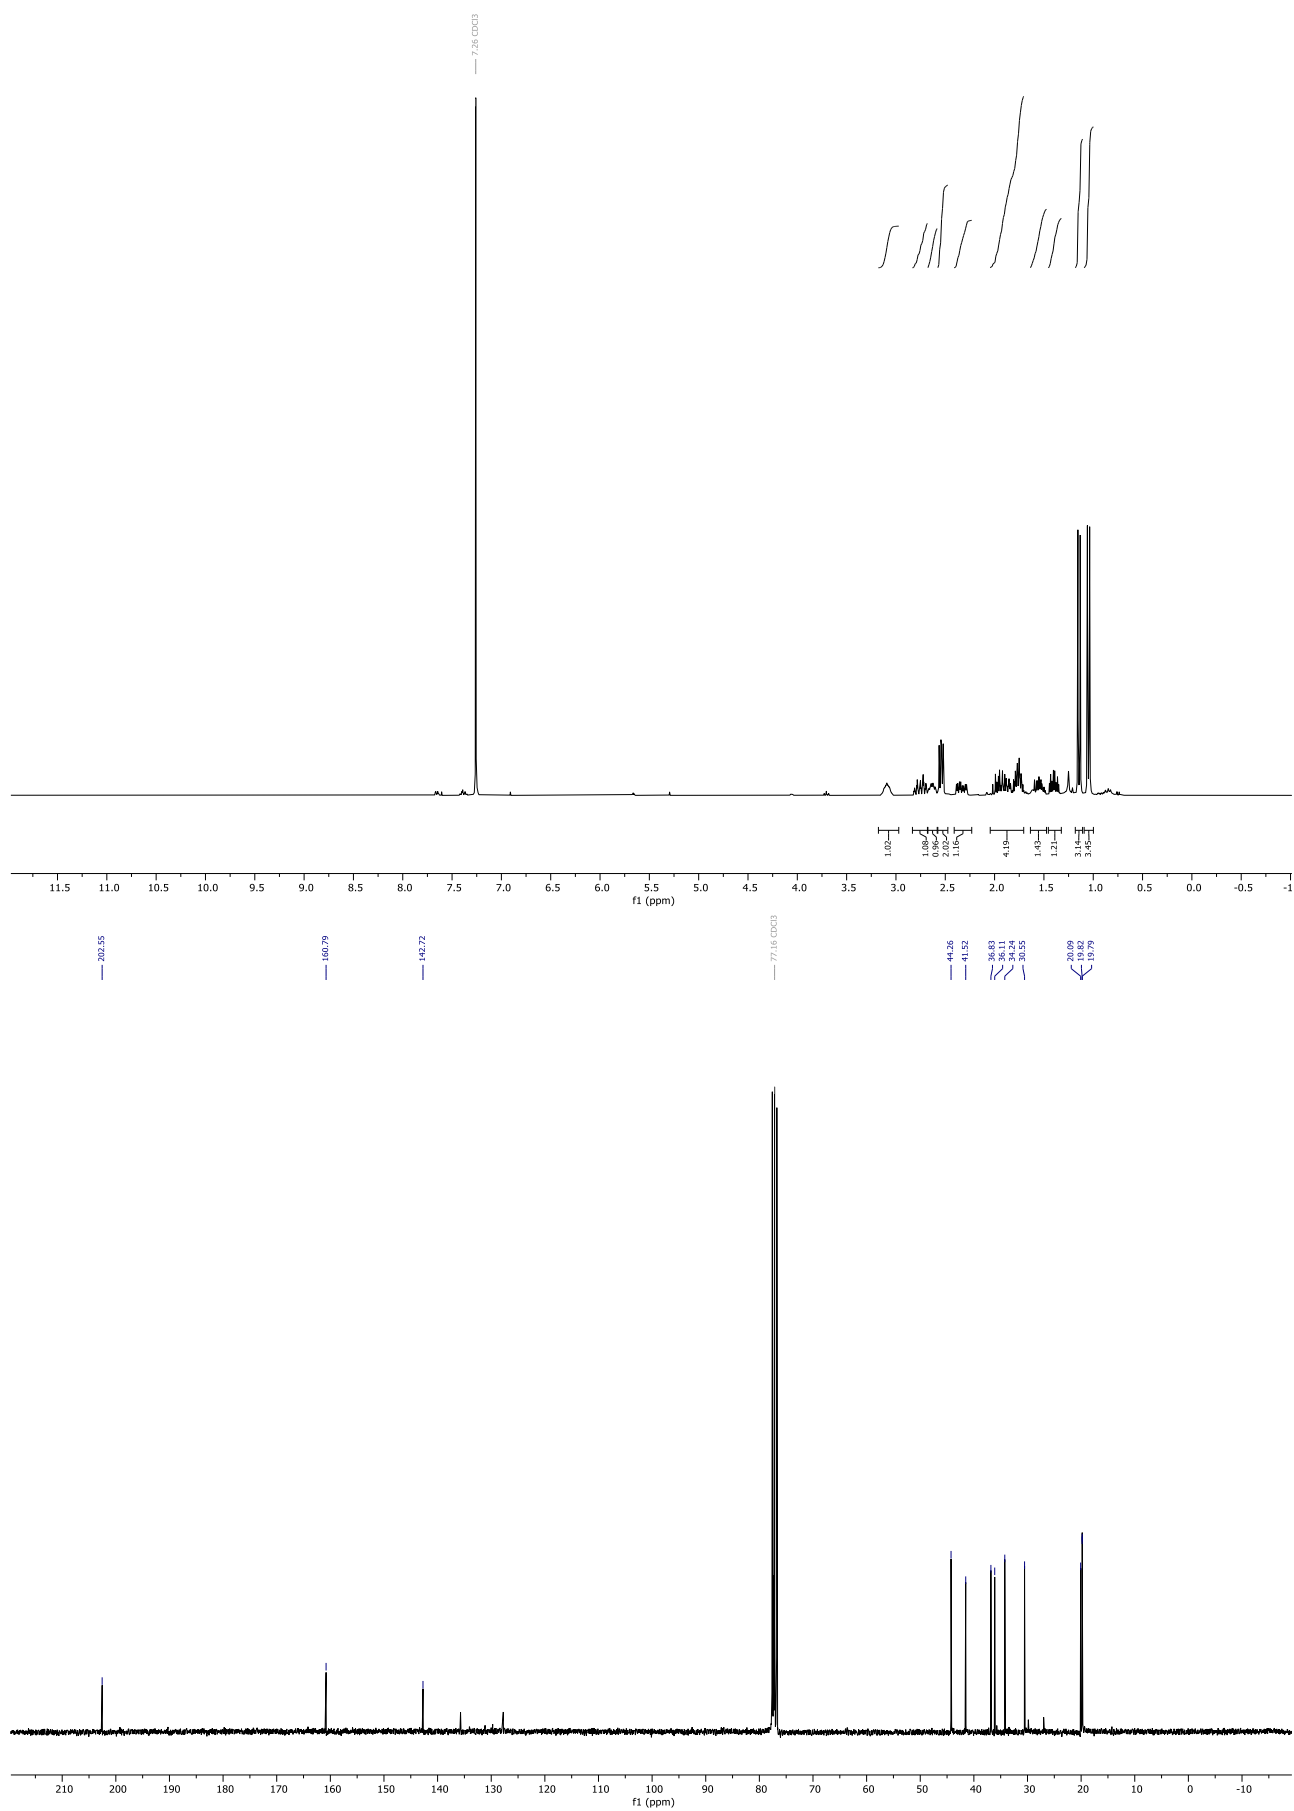

**Figure S3.** <sup>1</sup>H-NMR (300 MHz, CDCl<sub>3</sub>) and <sup>13</sup>C-NMR (75.5 MHz, CDCl<sub>3</sub>) spectra of compound **13**

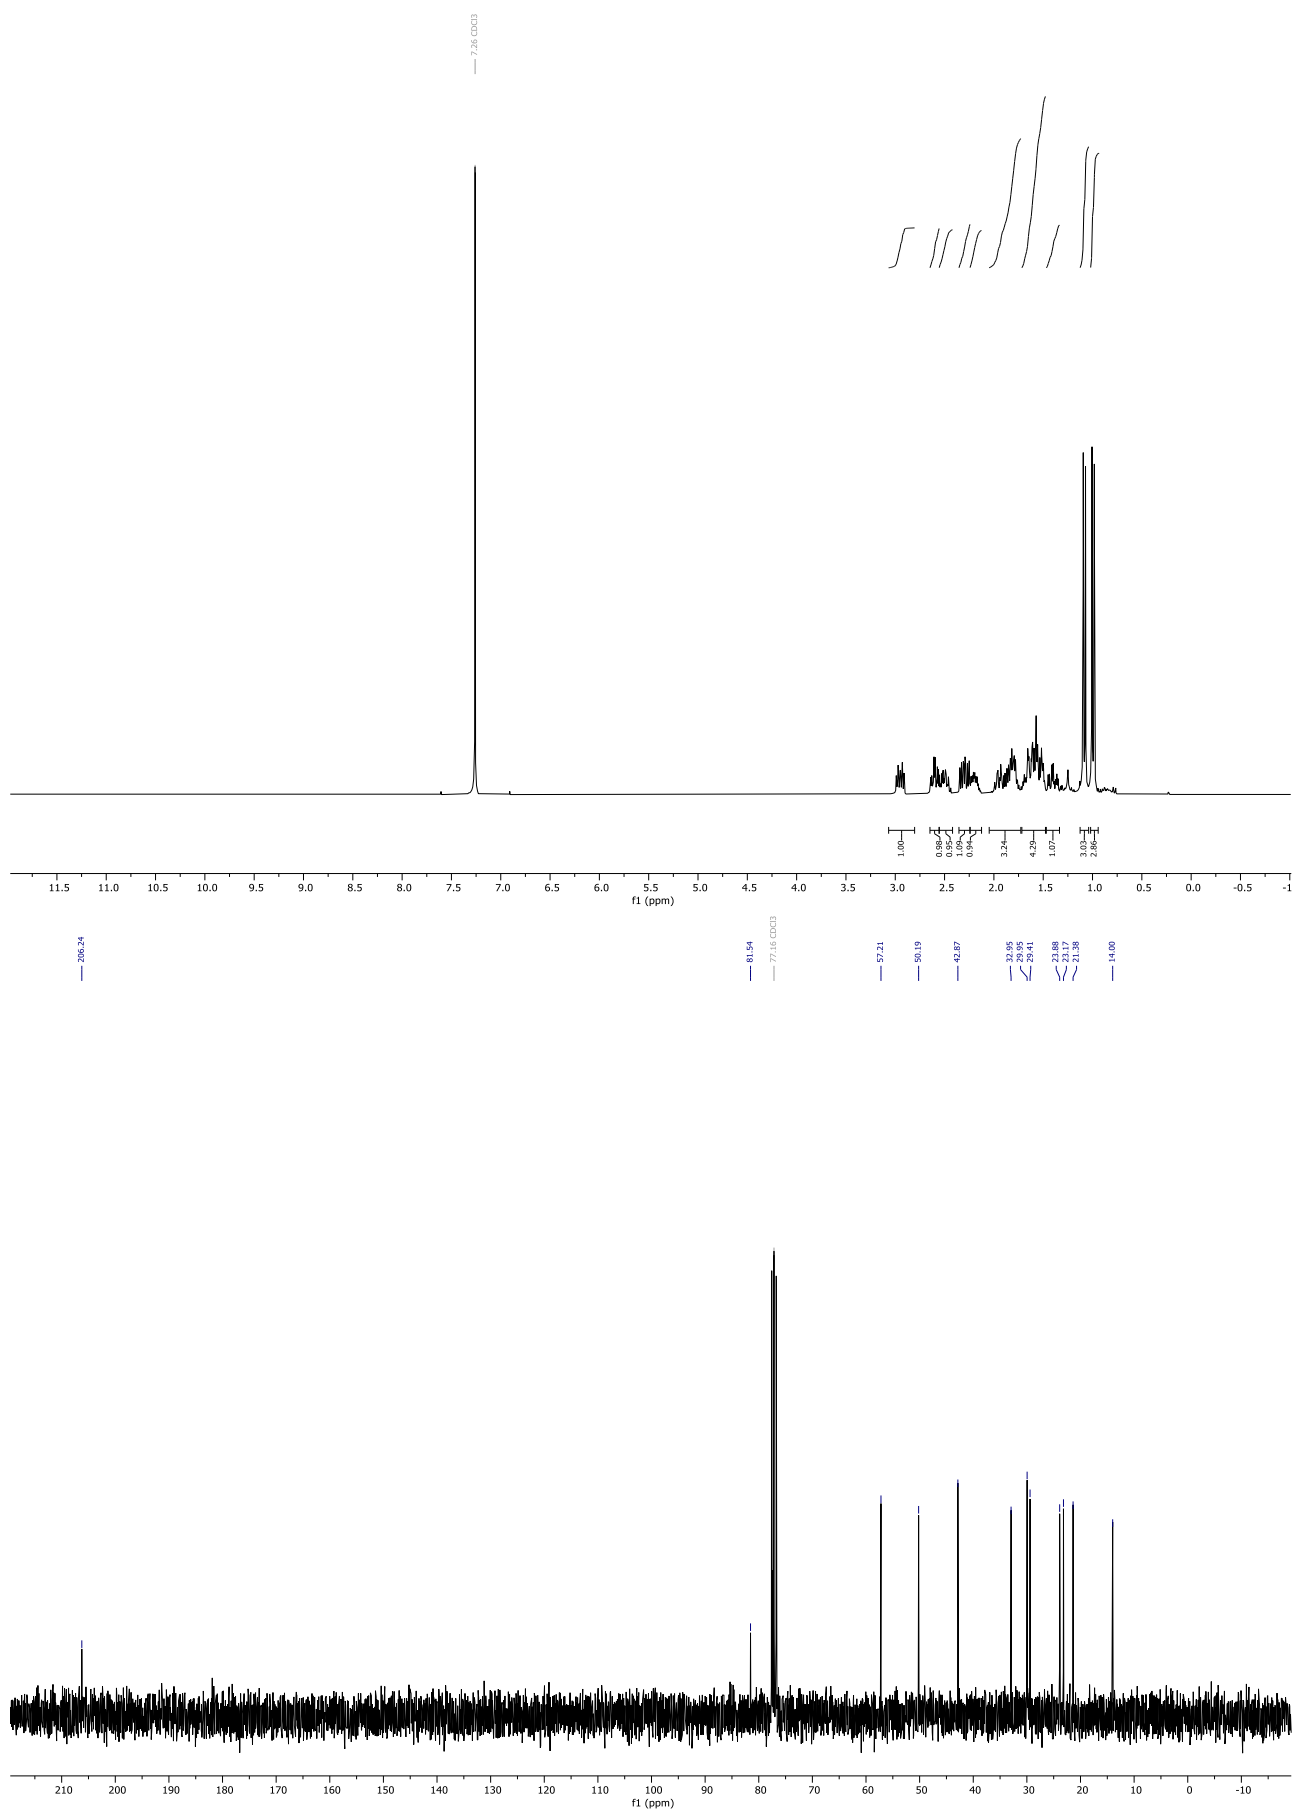

**Figure S4.** <sup>1</sup>H-NMR (300 MHz, CDCl<sub>3</sub>) and <sup>13</sup>C-NMR (75.5 MHz, CDCl<sub>3</sub>) spectra of compound **14**

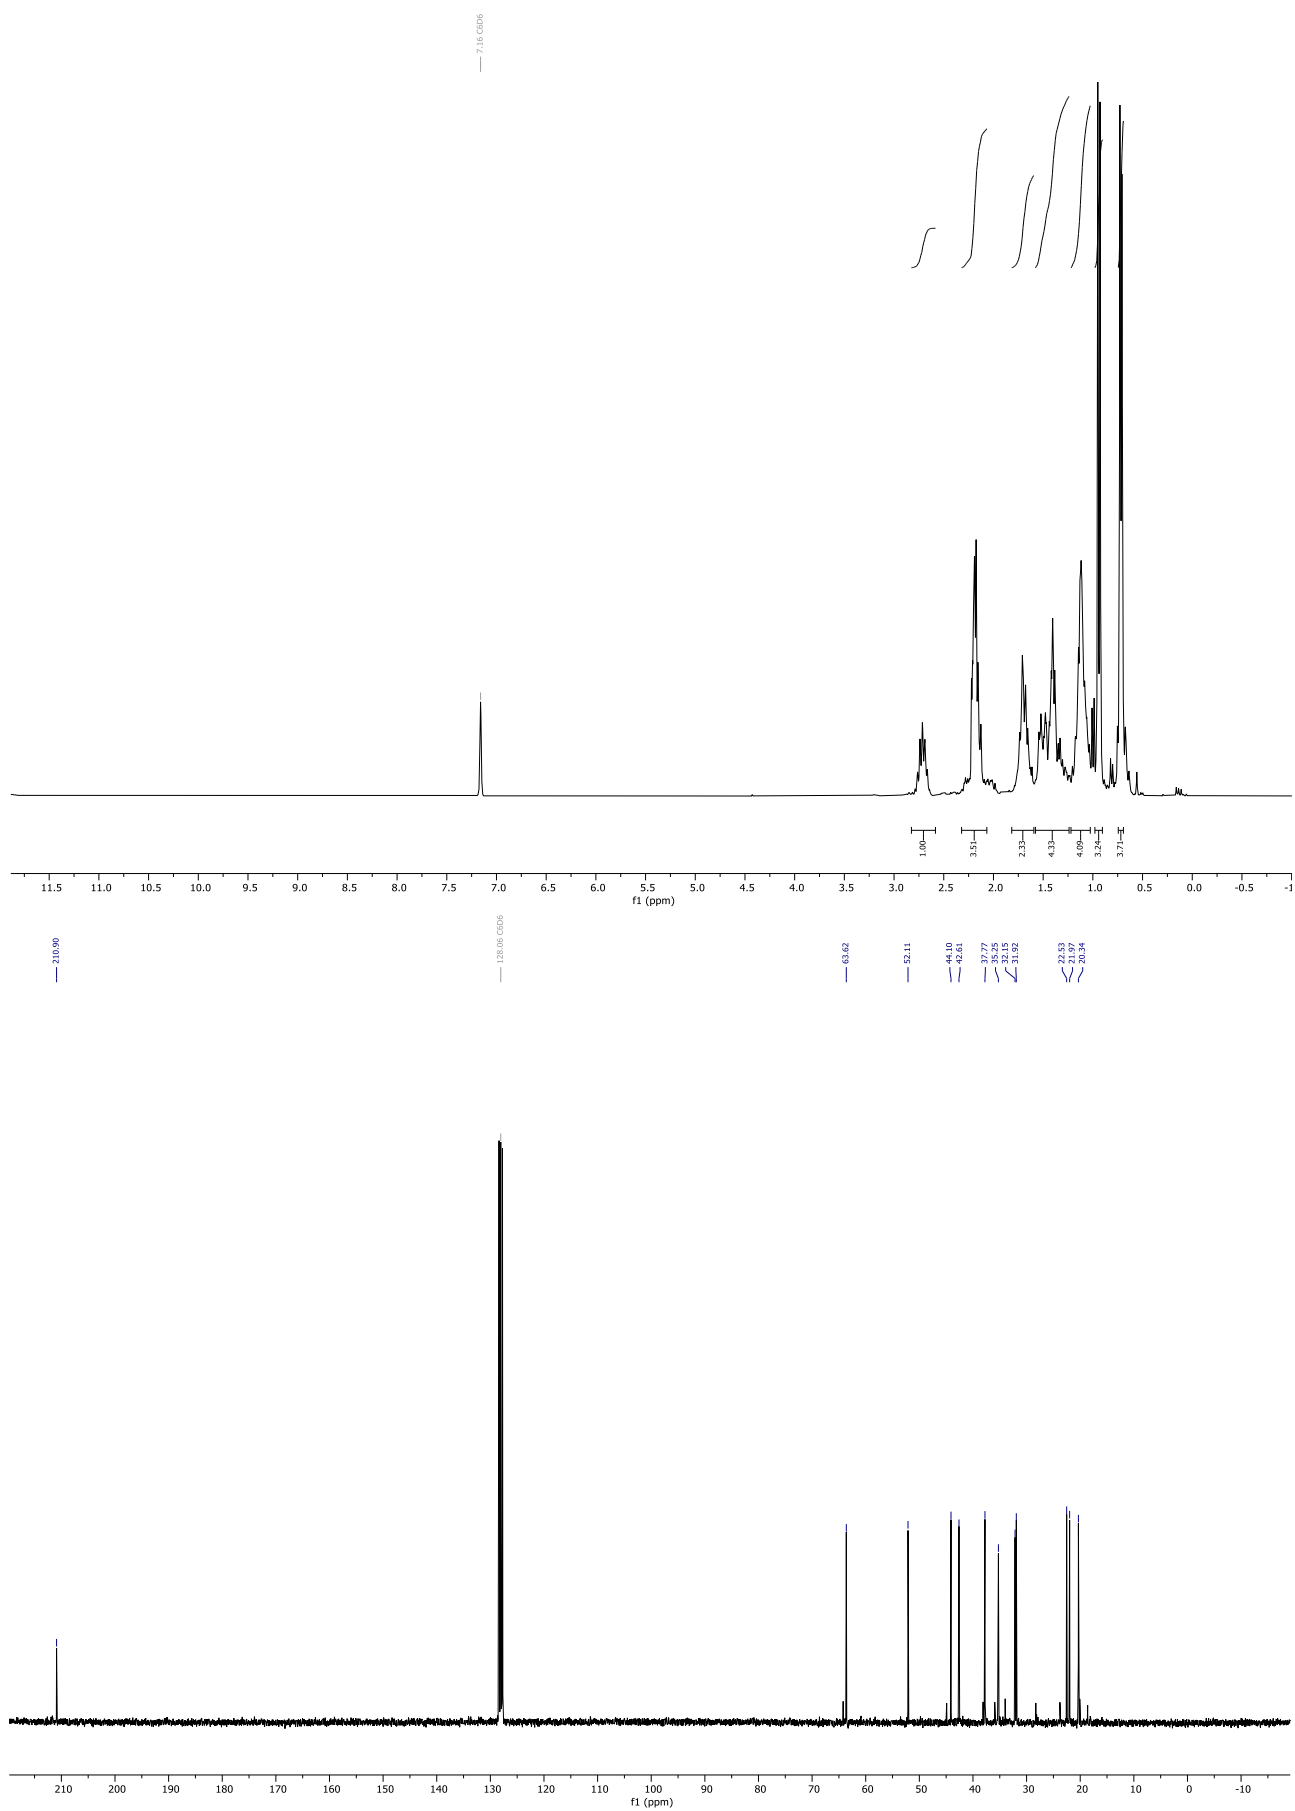

**Figure S5.**  $^1\text{H}$ -NMR (300 MHz,  $\text{C}_6\text{D}_6$ ) and  $^{13}\text{C}$ -NMR (75.5 MHz,  $\text{C}_6\text{D}_6$ ) spectra of compound **16**

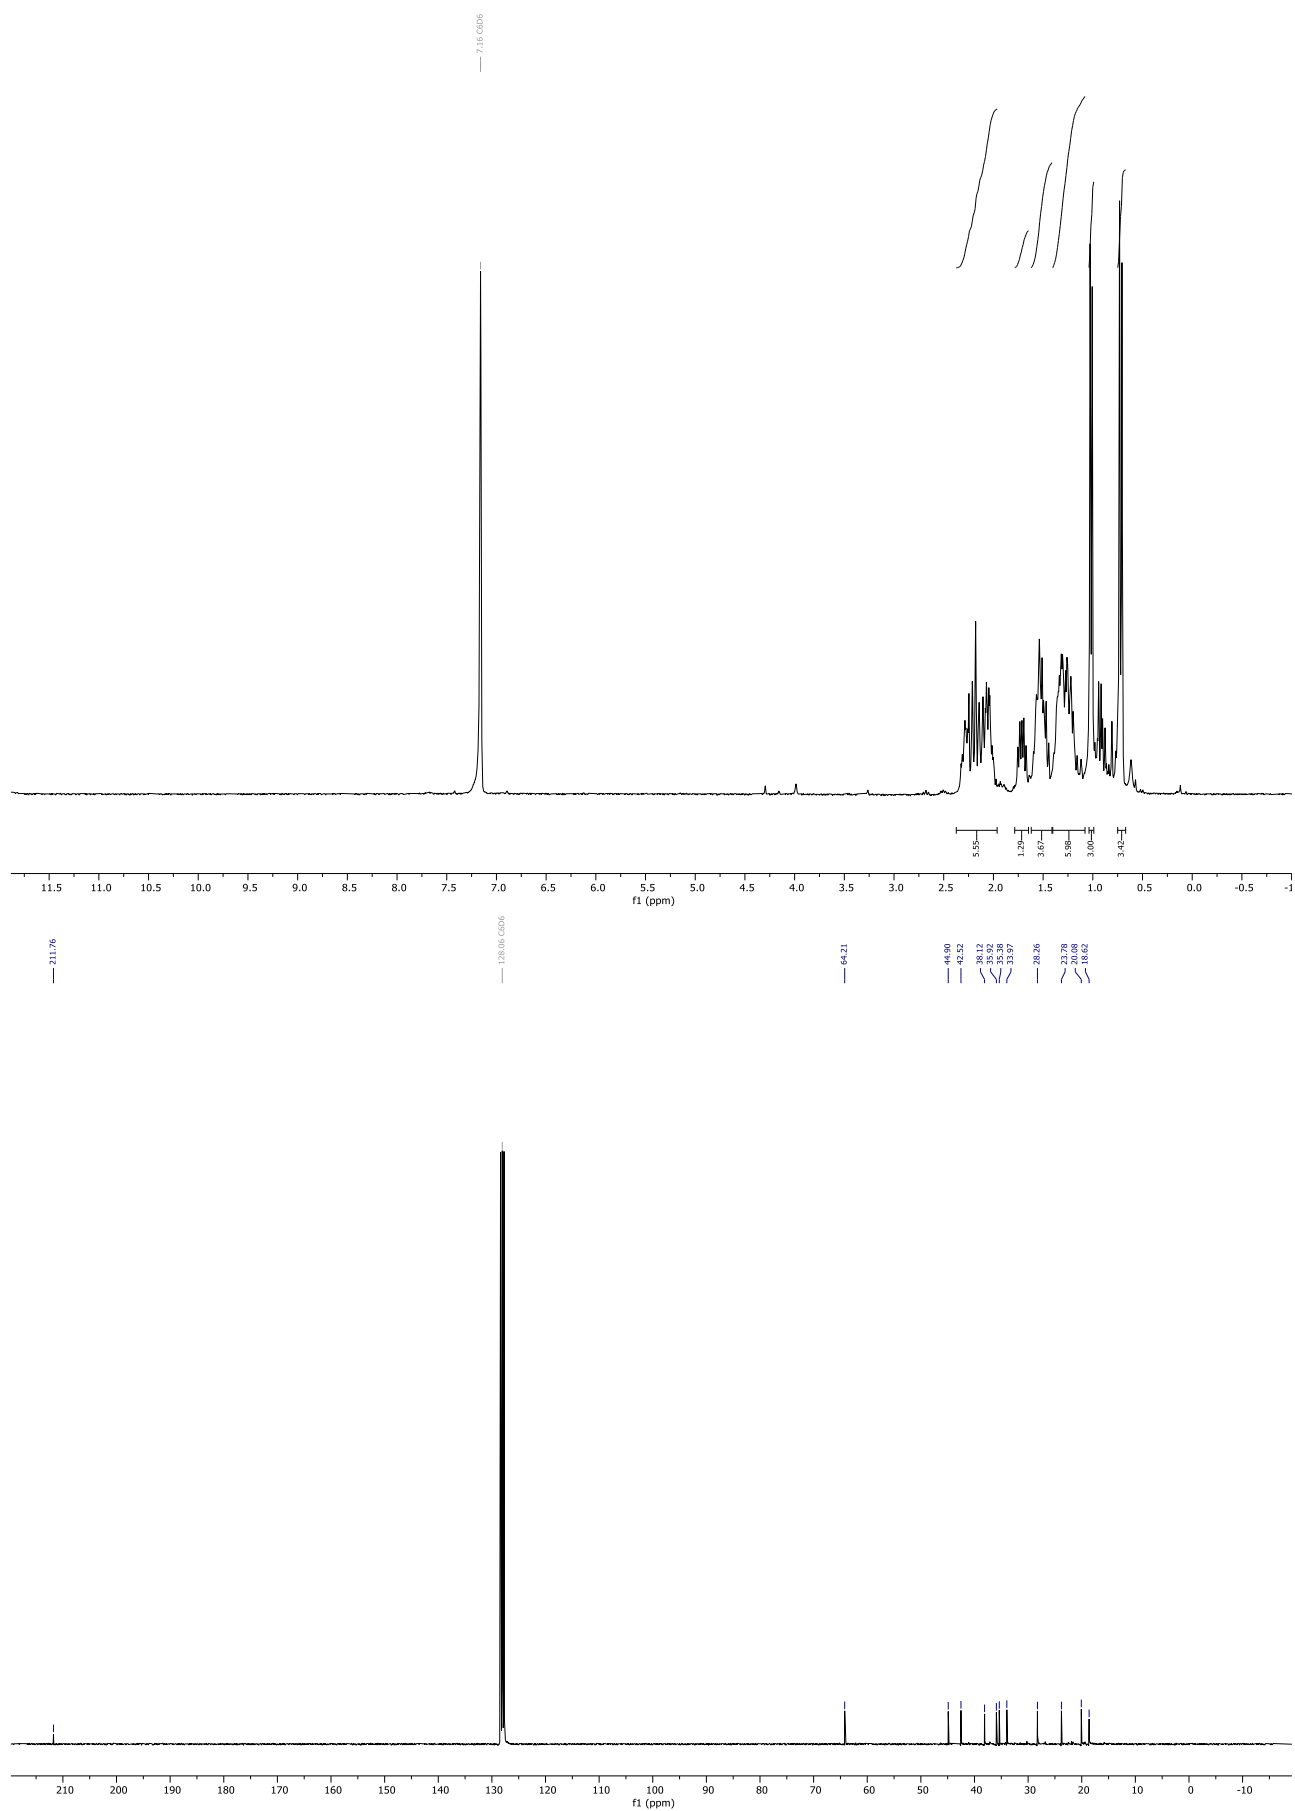

**Figure S6.**  $^1\text{H}$ -NMR (300 MHz,  $\text{C}_6\text{D}_6$ ) and  $^{13}\text{C}$ -NMR (75.5 MHz,  $\text{C}_6\text{D}_6$ ) spectra of compound 16'

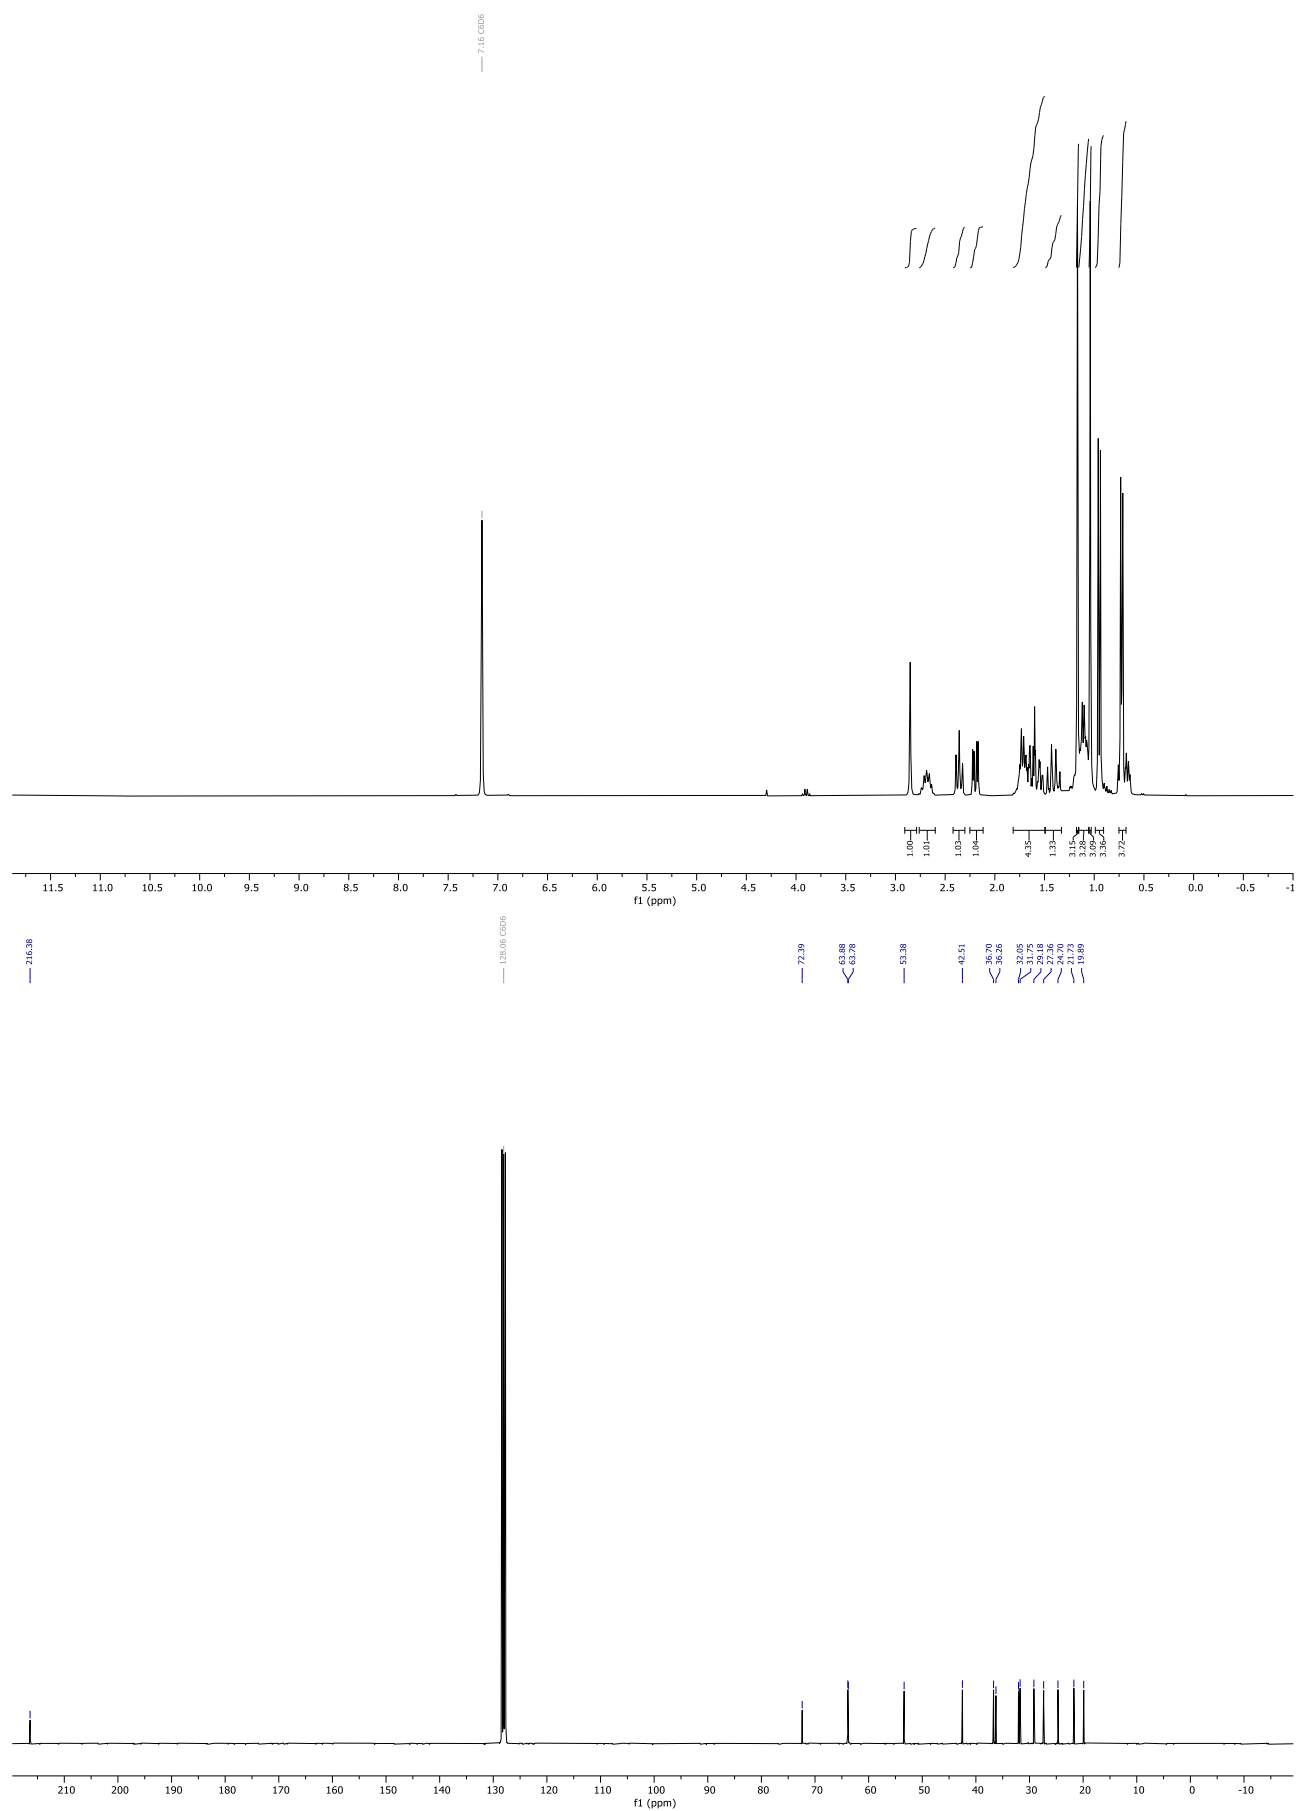

**Figure S7.** <sup>1</sup>H-NMR (300 MHz, C<sub>6</sub>D<sub>6</sub>) and <sup>13</sup>C-NMR (75.5 MHz, C<sub>6</sub>D<sub>6</sub>) spectra of compound **17**

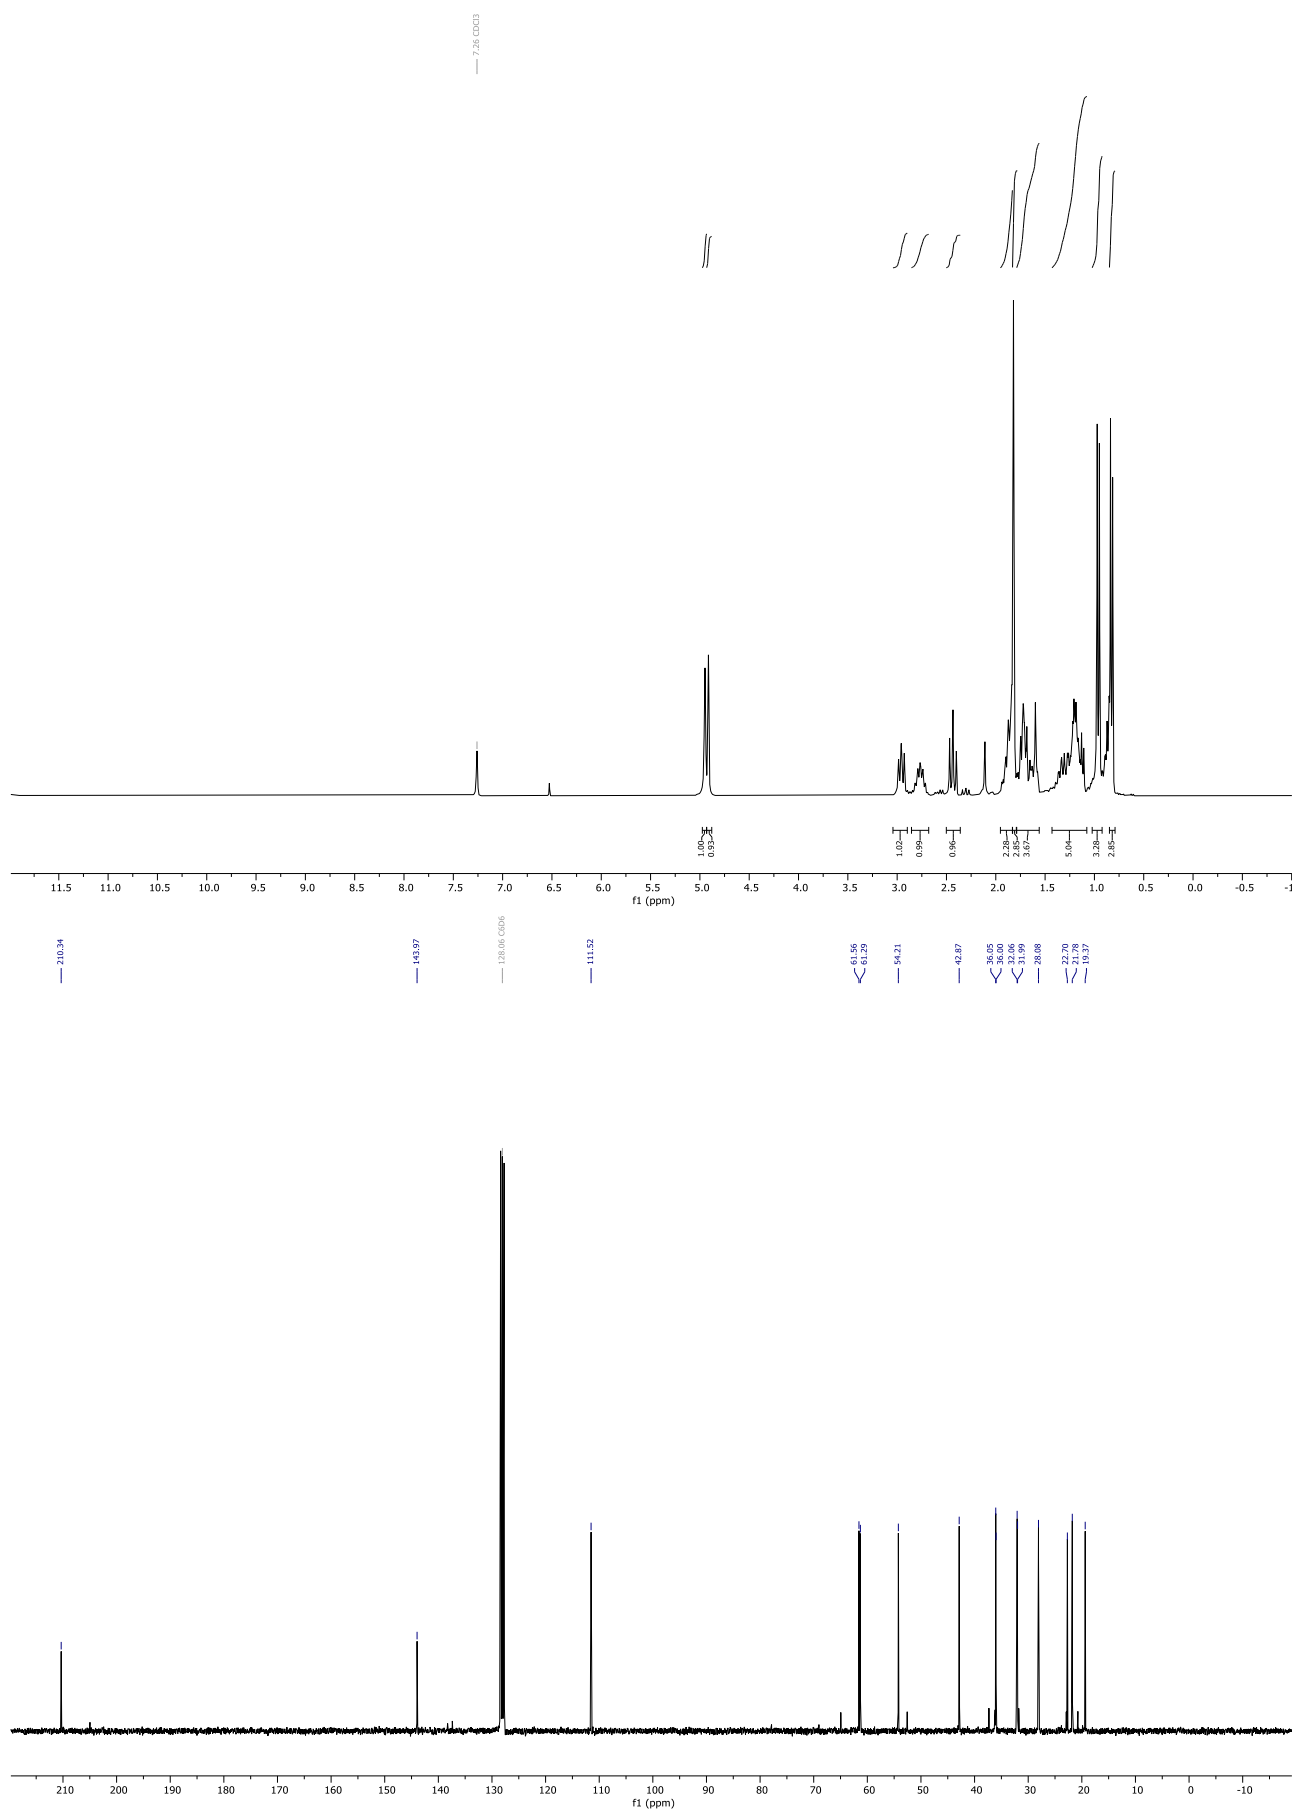

**Figure S8.**  $^1\text{H}$ -NMR (300 MHz,  $\text{C}_6\text{D}_6$ ) and  $^{13}\text{C}$ -NMR (75.5 MHz,  $\text{C}_6\text{D}_6$ ) spectra of compound **18**

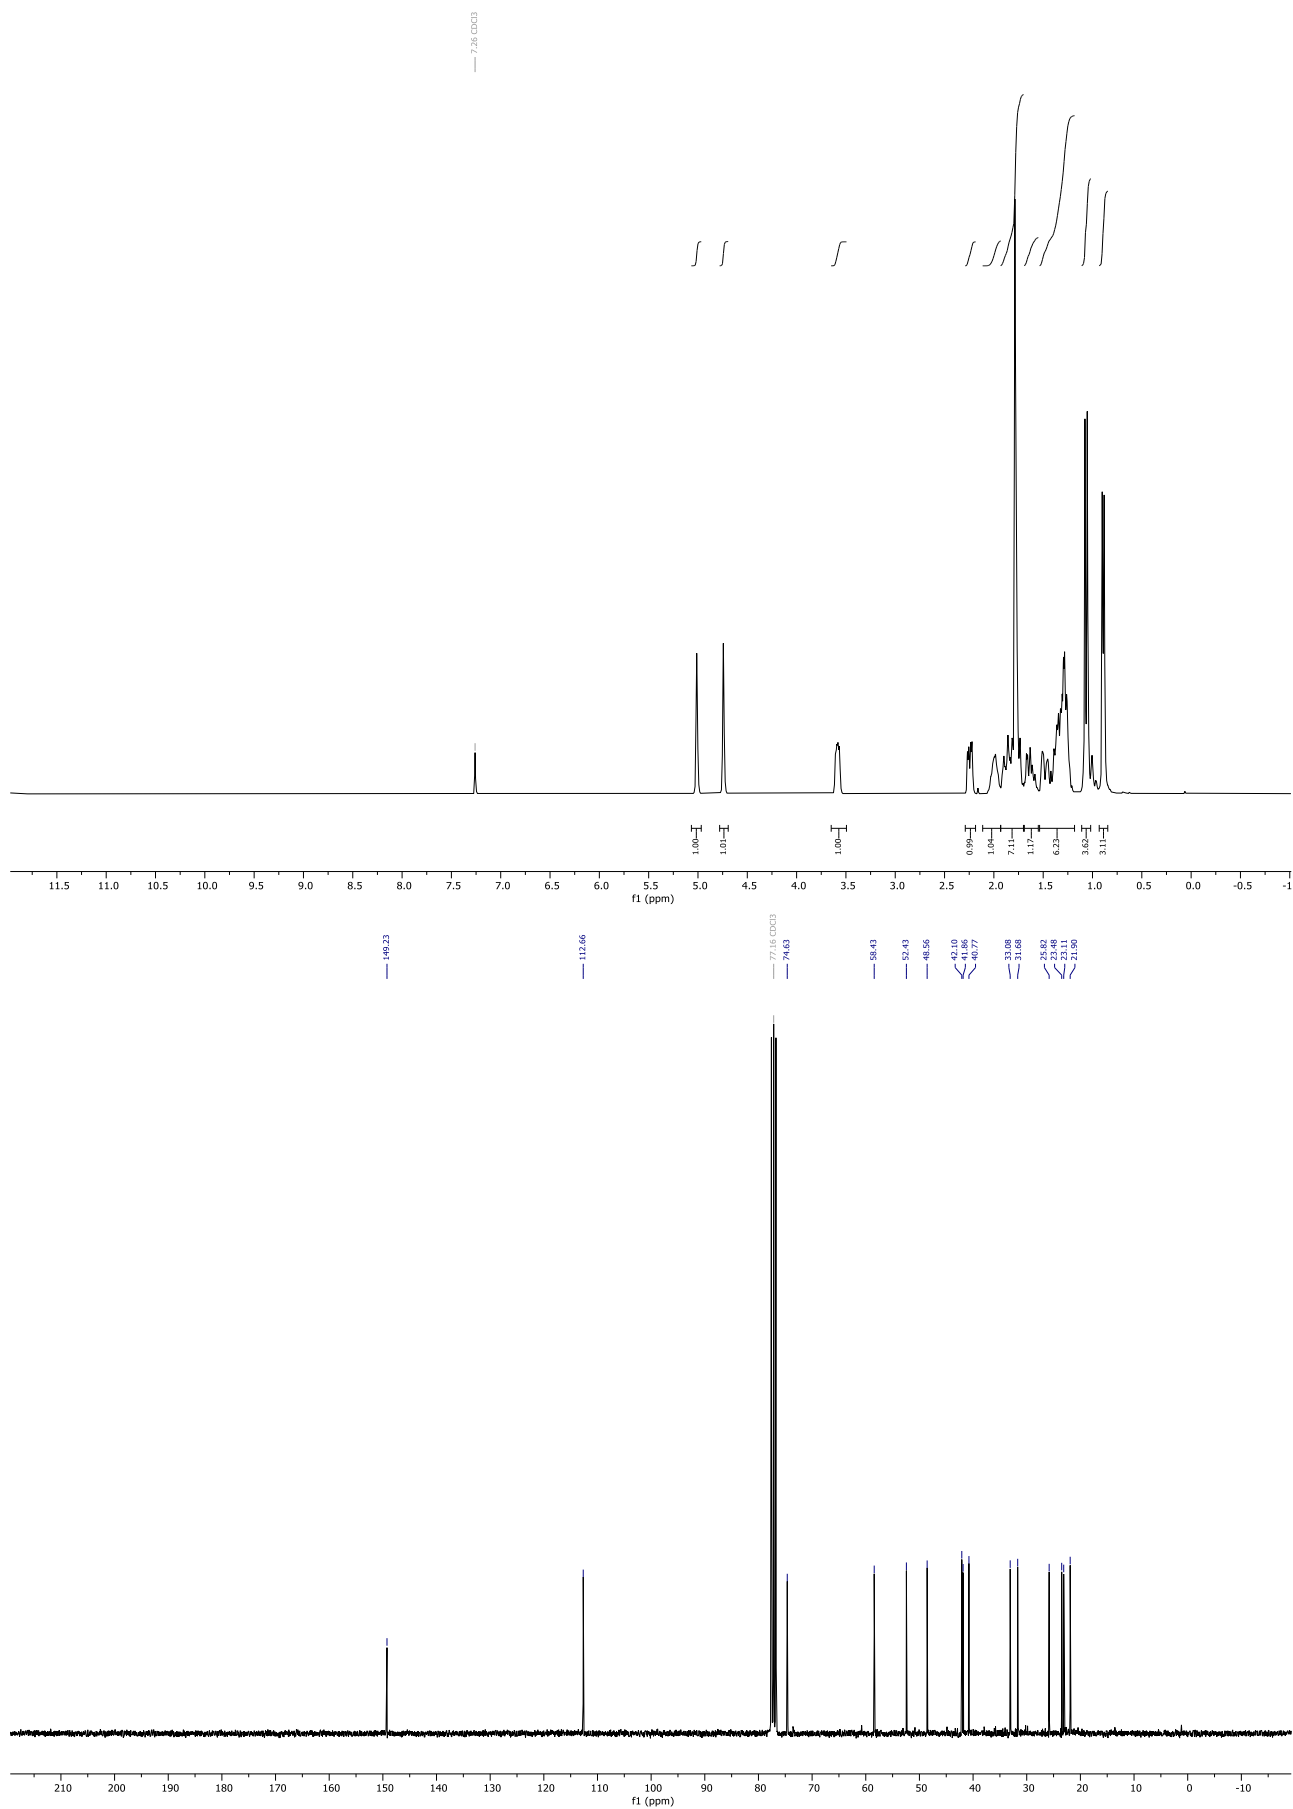

**Figure S9.** <sup>1</sup>H-NMR (300 MHz, CDCl<sub>3</sub>) and <sup>13</sup>C-NMR (75.5 MHz, CDCl<sub>3</sub>) spectra of compound **19**

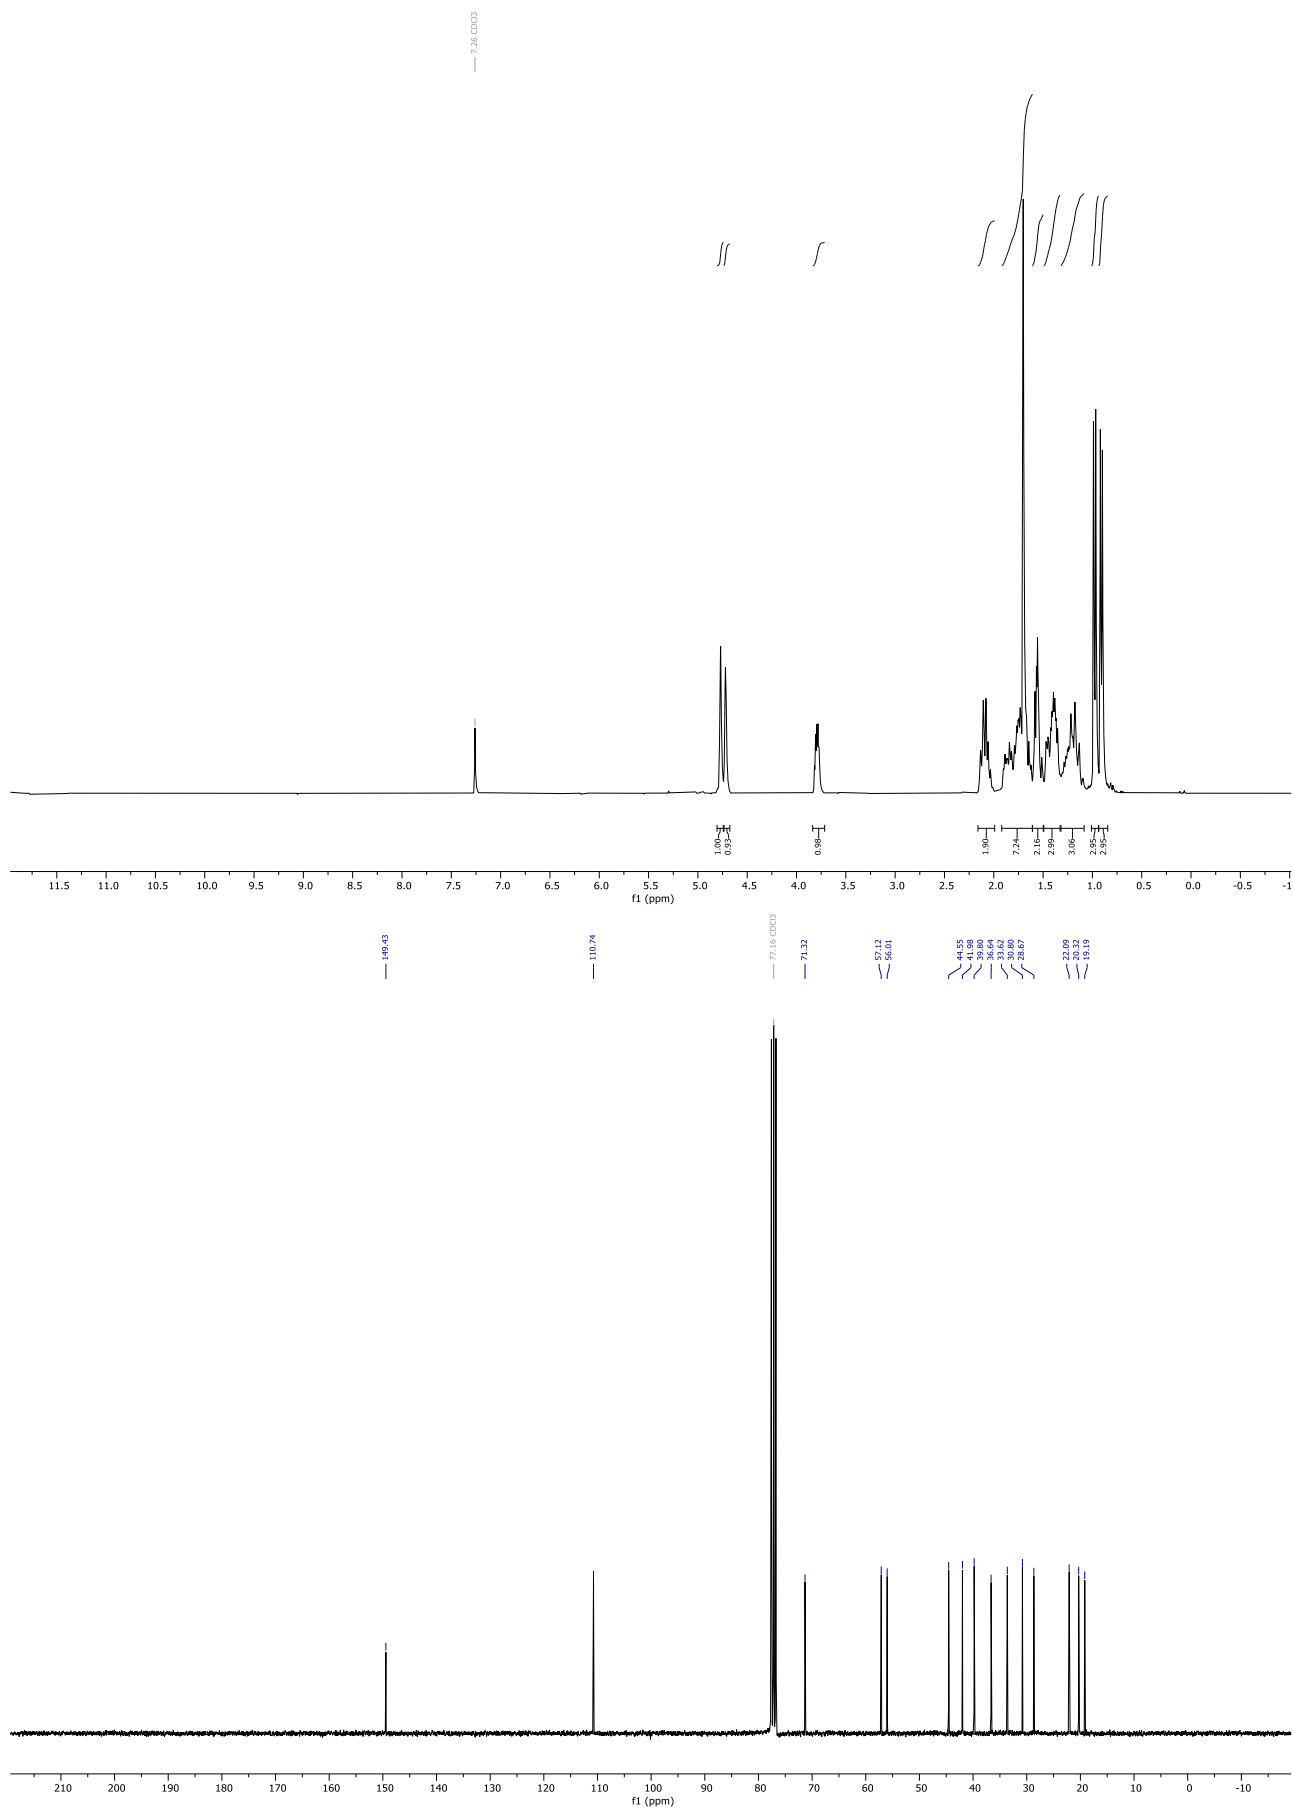

**Figure S10.**  $^1\text{H}$ -NMR (300 MHz,  $\text{CDCl}_3$ ) and  $^{13}\text{C}$ -NMR (75.5 MHz,  $\text{CDCl}_3$ ) spectra of compound 19'

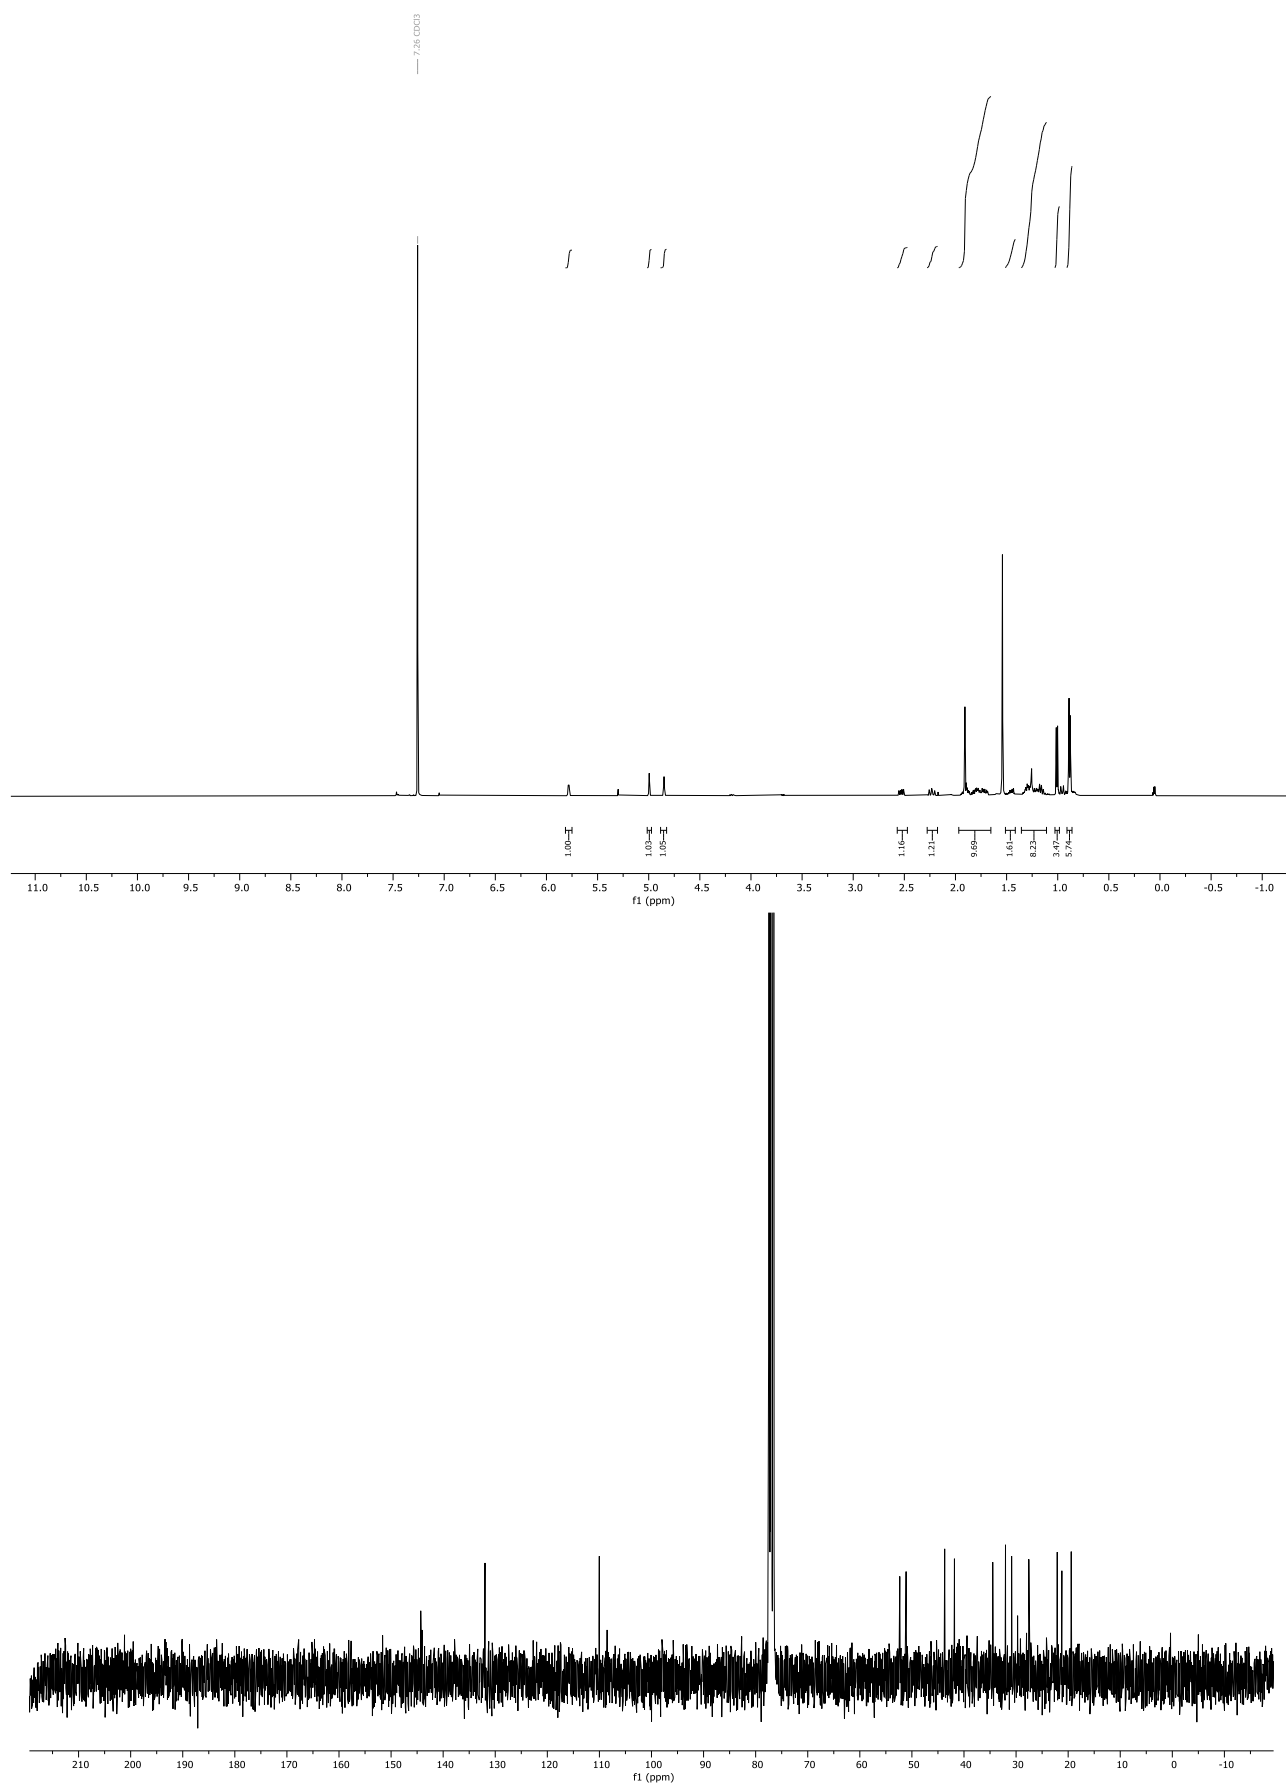

**Figure S11.** <sup>1</sup>H-NMR (500 MHz, CDCl<sub>3</sub>) and <sup>13</sup>C-NMR (125 MHz, CDCl<sub>3</sub>) spectra of compound *epi*-didehydrodihydroisoguaiene
